# Supplementary material for: An attenuated rate of leg muscle protein depletion and leg free amino acid efflux over time is seen in ICU long-stayers
Source: Springer Nature journal article supplement (doi:10.1186/s13054-017-1932-6), 2018-01-23

### **Additional file 1 to:**

An attenuated rate of leg muscle protein depletion and leg free amino acid efflux over time is seen in ICU long-stayers.

Lena Gamrin-Gripenberg<sup>1</sup>, Martin Sundström Rehal<sup>1</sup>, Daniel Olsson<sup>2</sup>, Jonathan Grip<sup>1</sup>, Jan Wernerman<sup>1</sup>, Olav Rooyackers<sup>1</sup>

<sup>1</sup>Department of Anesthesiology and Intensive Care Medicine, Perioperative Medicine and Intensive Care, Karolinska University Hospital Huddinge, and CLINTEC, Karolinska Institutet, Huddinge, Sweden.

<sup>2</sup>Medical Statistics, Department of Learning, Informatics, Management and Ethics, Karolinska Institutet, Stockholm, Sweden

**Table S1. Individual patient characteristics.**

| Pat. no. | BMI <sup>1</sup><br>(kg/m <sup>2</sup> ) | ICU LOS<br>(days) | SOFA<br>median (IQR) | Kcal/24h<br>mean±SD | Kcal/kg/24h<br>mean±SD | AA (g)/24h<br>mean±SD | AA (g)/kg/24h<br>mean±SD | Insulin<br>median (IQR) |
|----------|------------------------------------------|-------------------|----------------------|---------------------|------------------------|-----------------------|--------------------------|-------------------------|
| 1        | 27.9                                     | 42                | 6 (6-7)              | 1764±451            | 19±5                   | 92±37                 | 1.0±0.4                  | 44 (22-80)              |
| 2        | 33.5                                     | 31                | 4 (3-6)              | 2096±460            | 19±4                   | 98±25                 | 0.9±0.2                  | 179 (157-212)           |
| 3        | 27.0                                     | 30                | 8 (7-8)              | 1365±379            | 17±5                   | 74±21                 | 0.9±0.3                  | 73 (52-99)              |
| 4        | 23.5                                     | 24                | 6 (5-8)              | 1479±306            | 20±4                   | 83±17                 | 1.1±0.2                  | 51 (37-96)              |
| 5        | 25.4                                     | 36                | 4 (4-7)              | 1737±369            | 19±4                   | 86±20                 | 0.9±0.2                  | 74 (57-101)             |
| 6        | 23.2                                     | 22                | 4 (3-6)              | 1513±403            | 20±5                   | 76±25                 | 1.0±0.3                  | 70 (58-75)              |
| 7        | 30.5                                     | 17                | 4 (1-5)              | 1776±631            | 17±6                   | 81±29                 | 0.8±0.3                  | 66 (26-73)              |
| 8        | 38.6                                     | 69                | 12 (10-13)           | 2138±401            | 14±3                   | 105±23                | 0.7±0.1                  | 87 (70-115)             |
| 9        | 24.7                                     | 30                | 5 (5-6)              | 1452±536            | 20±7                   | 73±27                 | 1.0±0.4                  | 57 (32-78)              |
| 10       | 25.9                                     | 16                | 2 (2-3)              | 1314±491            | 17±6                   | 74±29                 | 0.9±0.4                  | 31 (28-40)              |
| 11       | 28.4                                     | 27                | 8 (6-9)              | 1410±598            | 15±6                   | 73±35                 | 0.8±0.4                  | 55 (24-85)              |
| 12       | 23.4                                     | 9                 | 12 (11-13)           | 1149±526            | 19±9                   | 64±32                 | 1.0±0.5                  | 27 (17-54)              |
| 13       | 23.7                                     | 21                | 7 (6-9)              | 1540±338            | 23±5                   | 77±19                 | 1.2±0.3                  | 70 (34-90)              |
| 14       | 19.4                                     | 24                | 6 (4-9)              | 1152±374            | 22±7                   | 65±32                 | 1.2±0.6                  | 5 (3-6)                 |
| 15       | 22.0                                     | 27                | 4 (2-4)              | 1854±561            | 24±7                   | 98±32                 | 1.3±0.4                  | 81 (72-101)             |
| 16       | 33.8                                     | 24                | 7 (3-7)              | 1925±678            | 18±6                   | 99±35                 | 0.9±0.3                  | 39 (26-49)              |
| 17       | 15.7                                     | 14                | 6.5 (5.5-7)          | 1272±650            | 22±11                  | 50±35                 | 0.8±0.6                  | 28 (22-47)              |
| 18       | 32.2                                     | 21                | 3 (3-3)              | 1764±493            | 17±5                   | 81±25                 | 0.8±0.2                  | 43 (30-45)              |
| 19       | 26.1                                     | 68                | 3 (2-3)              | 2410±800            | 23±8                   | 114±39                | 1.1±0.4                  | 22 (18-26)              |
| 20       | 27.4                                     | 88                | 6 (4-9)              | 2269±519            | 27±6                   | 99±24                 | 1.2±0.3                  | 24 (16-30)              |

<sup>1</sup>: mean of study days. AA: Amino acids; ICU: Intensive care unit; IQR: Inter-quartile range; LOS: Length of stay; SOFA: Sequential Organ Failure Assessment. Data is presented as mean ± SD for normally distributed data and as median (IQR) for non-normally distributed data.

**Table S2. Patients characteristics at the 2 measurement periods illustrated in Figure 2.**

|                                                 | <b>ICU day 10-20</b> | <b>ICU day 30-40</b> |
|-------------------------------------------------|----------------------|----------------------|
| <b>Weight (kg)</b>                              | 75 (64, 86)          | 78 (70, 91)          |
| <b>SOFA</b>                                     | 7 (5, 8)             | 5 (4, 7)             |
| <b>Mechanical ventilation (%)</b>               | 100 %                | 100%                 |
| <b>CRRT (%)</b>                                 | 30 %                 | 30 %                 |
| <b>Caloric intake<sup>1</sup> (kcal/kg/day)</b> | 21 (19, 25)          | 18 (18, 23)          |
| <b>Amino acid intake<sup>1</sup> (g/kg/day)</b> | 1.1 (1.0, 1.2)       | 1.0 (0.9-1.2)        |
| <b>Insulin IU/24 h</b>                          | 45 (27, 86)          | 26 (13, 69)          |

Values are given as n(%), medians (inter-quartile range). <sup>1</sup>: Median during 5 days before sampling.

Figure S1.

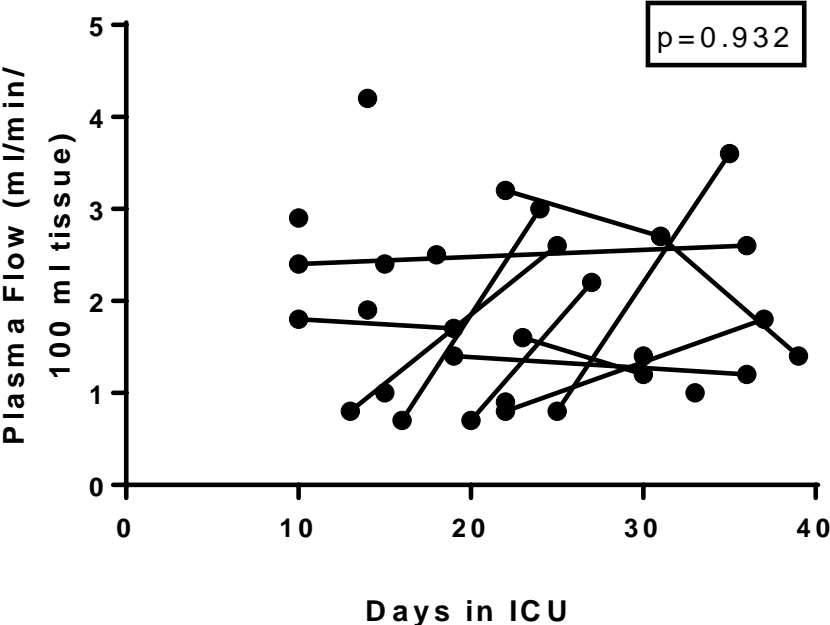

Figure S1. A longitudinal presentation of plasma flow across the leg on 30 occasions measured by venous occlusion plethysmography in long-staying ICU patients (n=20). The p-values from the linear mixed effect model against time in the ICU are indicated.

Figure S2.

A.

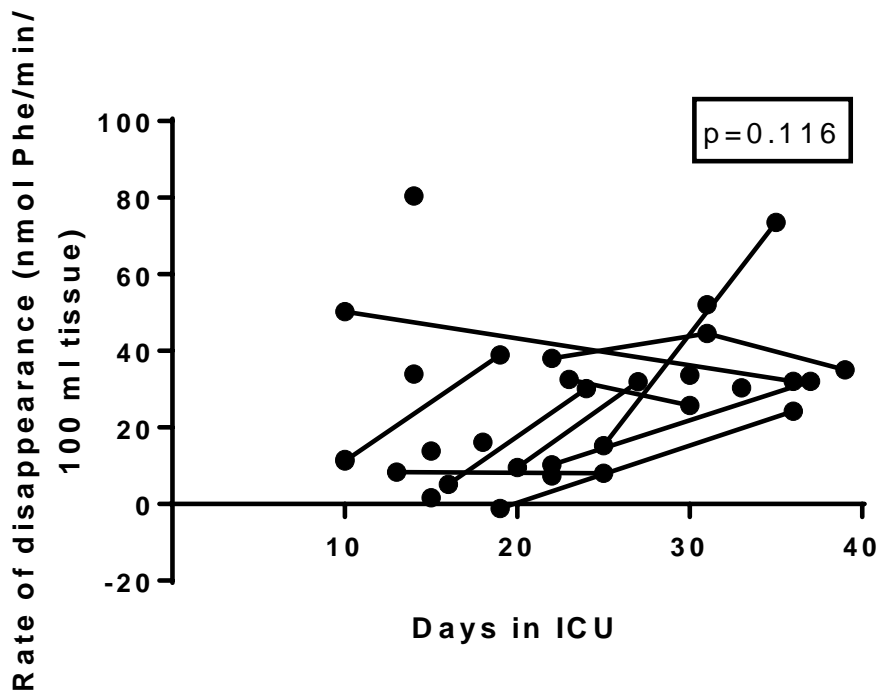

B.

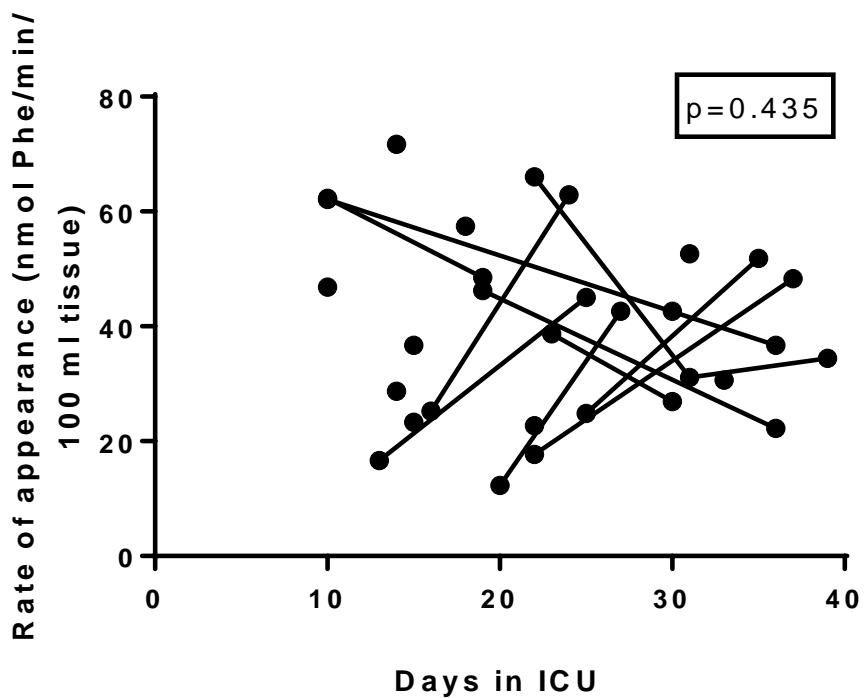

**Figure S2.** A longitudinal presentation of phenylalanine turnover in the leg on 30 occasions in long-staying ICU patients (n=20) assessed with a 2-pool model. The two panels depict; A) the rate of disappearance, and B) the rate of appearance. The p-values from the linear mixed effect model against time in the ICU are indicated.

Figure S3.

A.

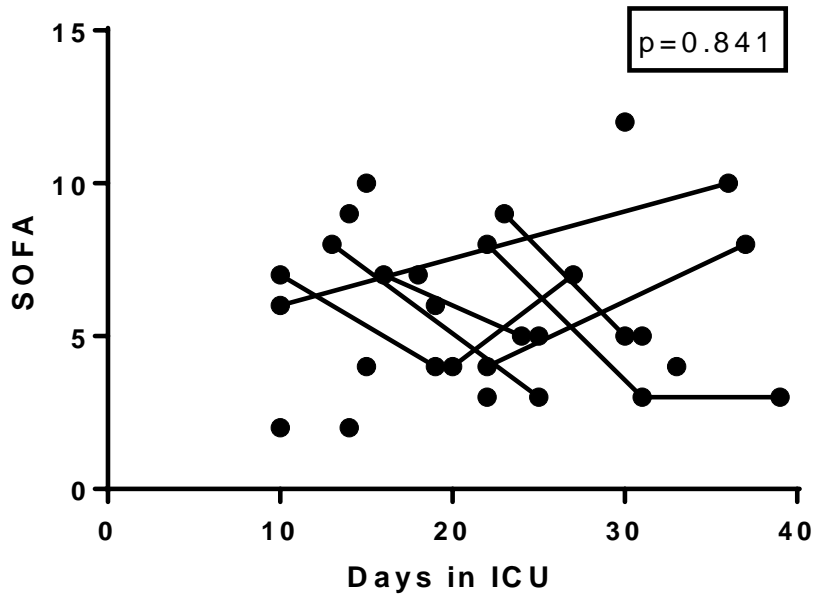

B.

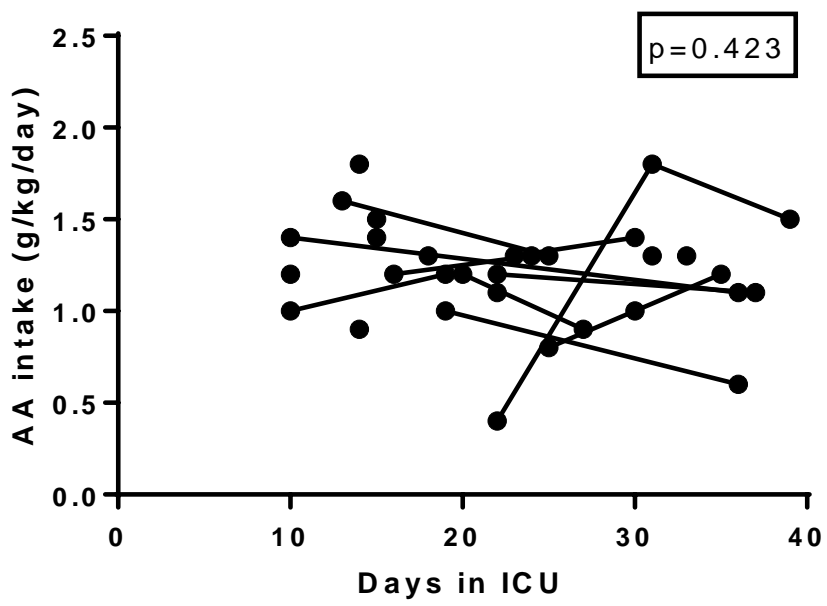

C.

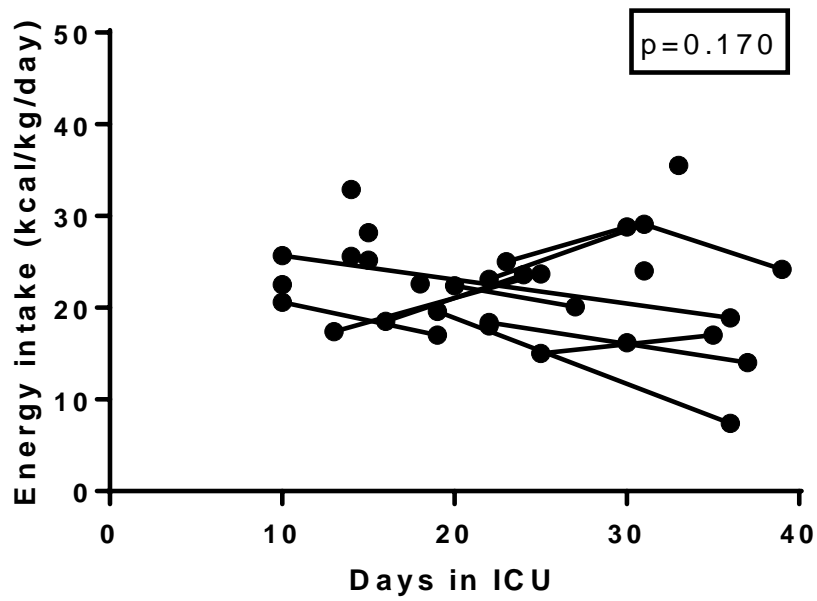

**Figure S3.** A longitudinal presentation of the SOFA score (panel A), the amino acid intake (panel B) and the energy intake (panel C) on 30 occasions measured in long-staying ICU patients (n=20). The p-values from the linear mixed effect model against time in the ICU are indicated.

**Figure S4.** Longitudinal presentations of free amino acid fluxes across the leg on 30 occasions in longstaying ICU patients (n=20). Individual amino acids are displayed in 21 panels, in addition also the combined branched chain amino acids (BCAA) and the combined essential amino acids (EAA) are displayed in two additional piles. The p-values from the linear mixed effect model against time in the ICU are indicated. Significant correlations are indicated in red text.

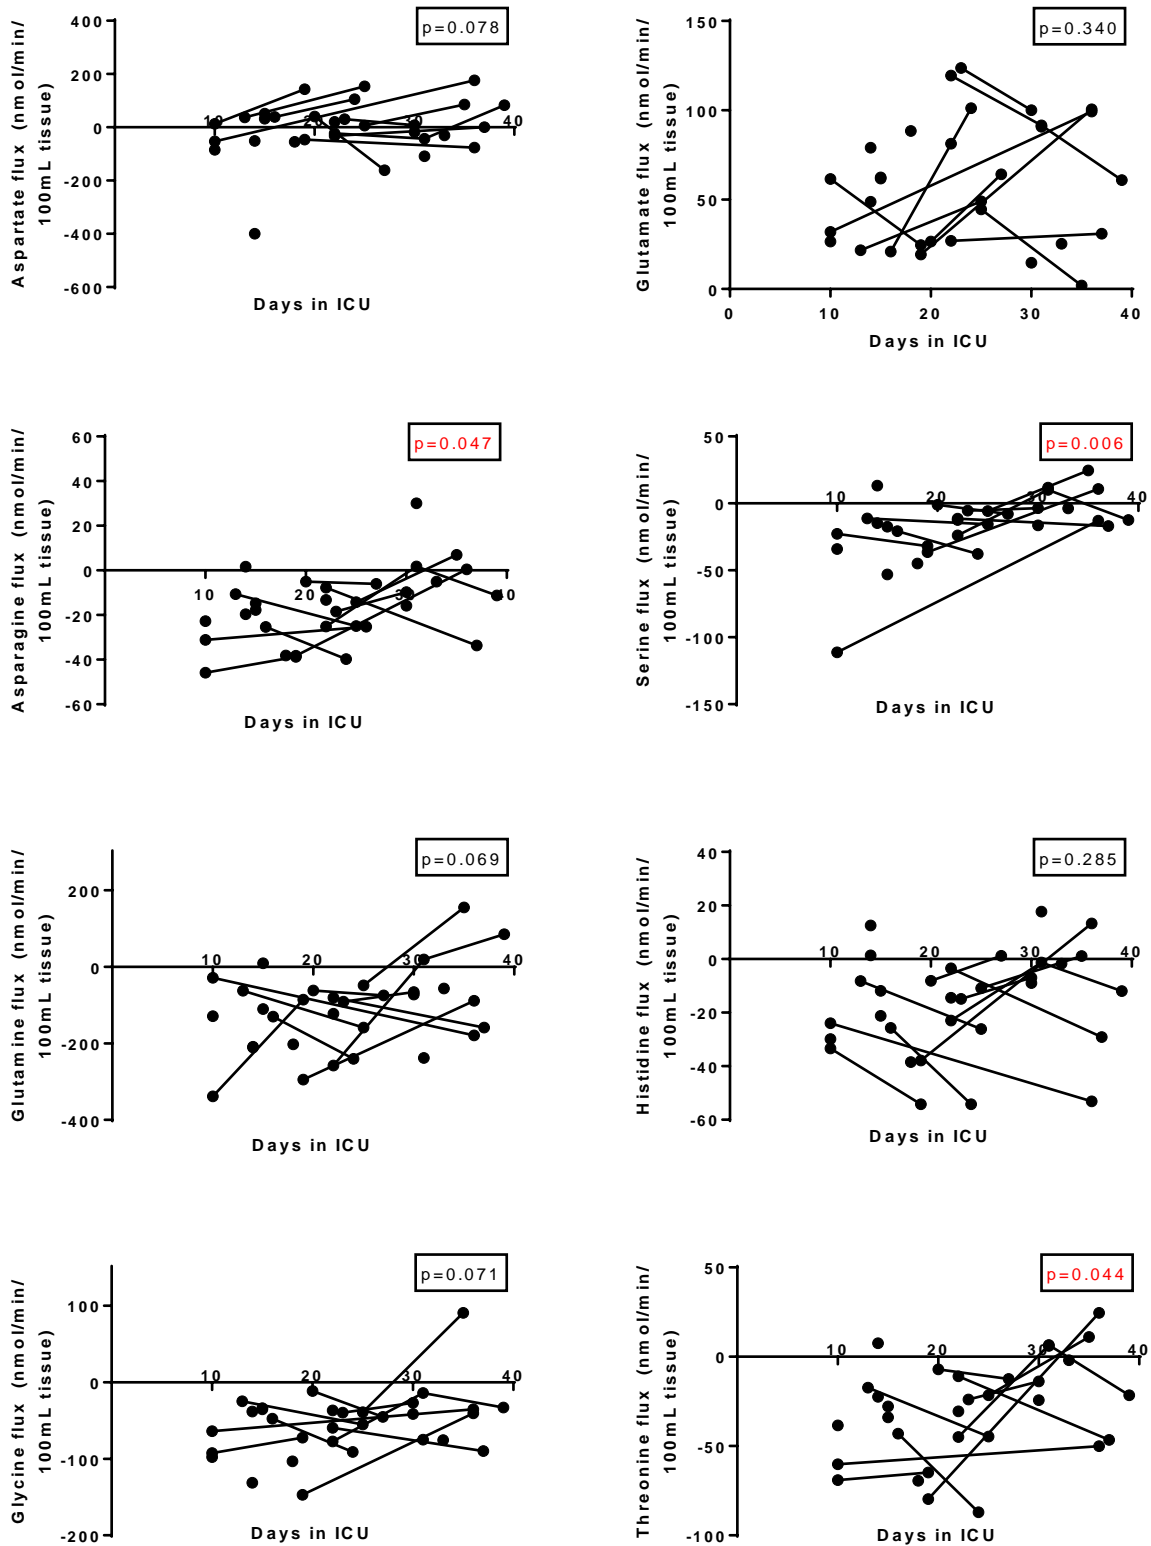

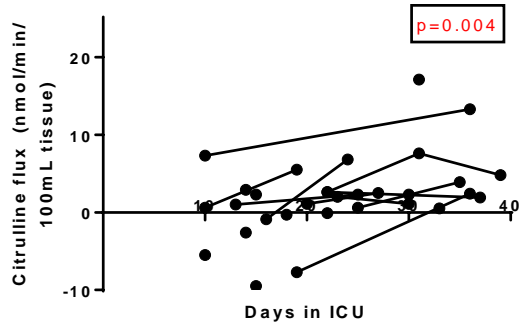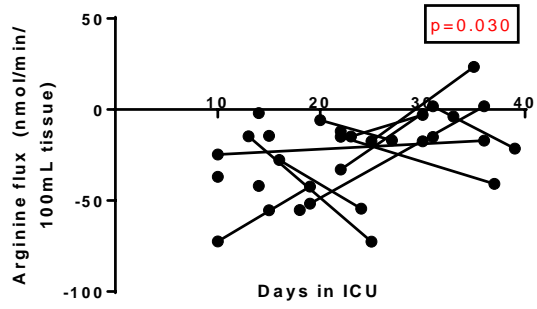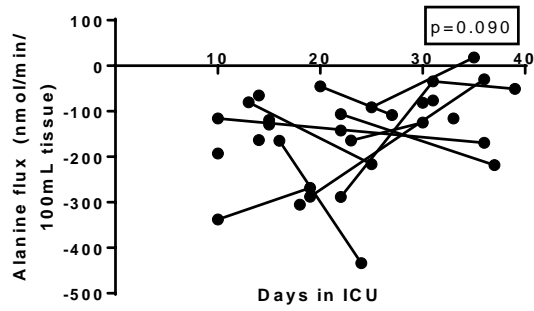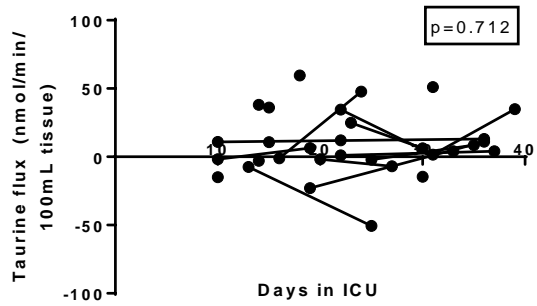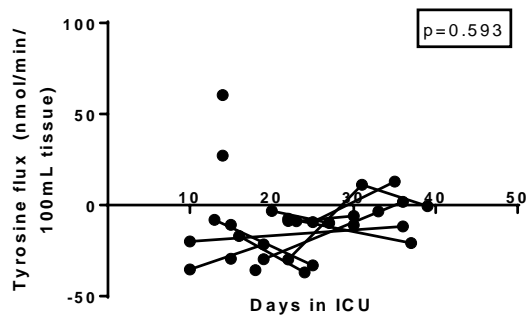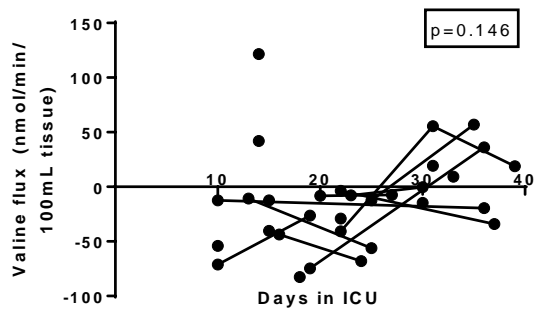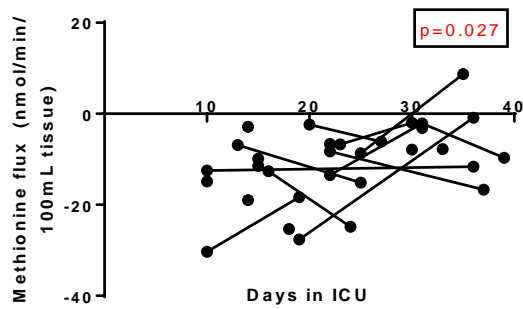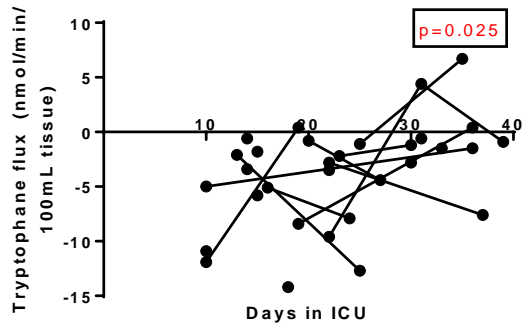



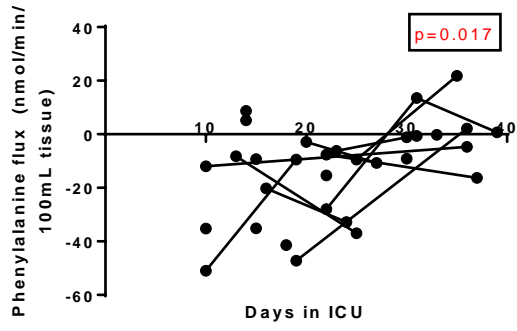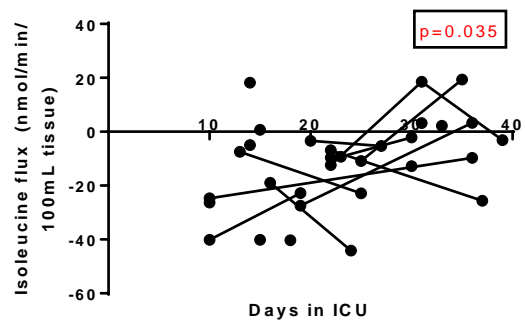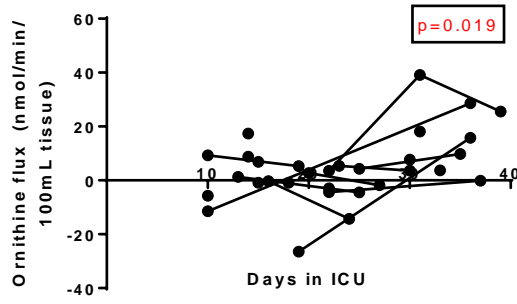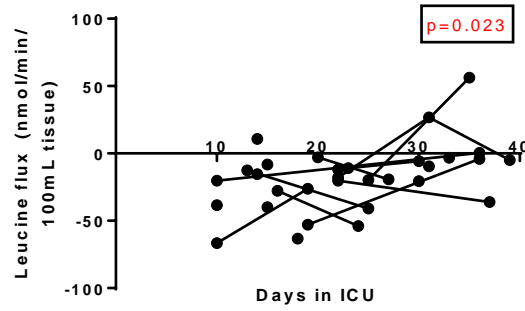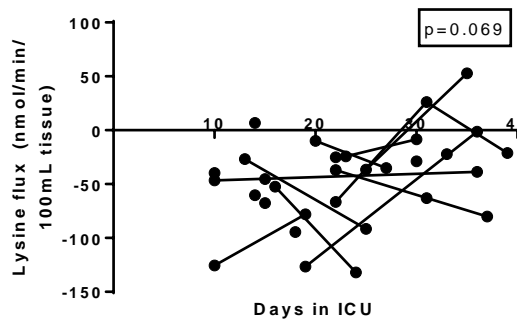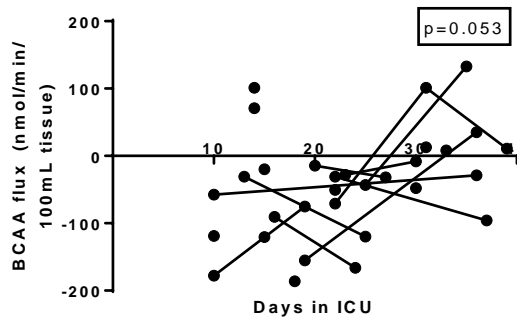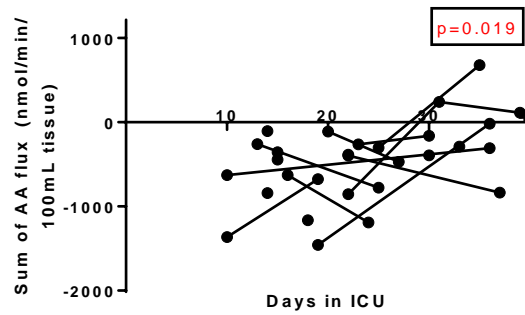

**Figure S5.** Longitudinal presentations of free amino acid concentrations in arterial plasma on 30 occasions in longstaying ICU patients (n=20). Individual amino acids are displayed in 21 panels, in addition also the combined branched chain amino acids (BCAA) and the combined essential amino acids (EAA) are displayed in two additional piles. The p-values from the linear mixed effect model against time in the ICU are indicated. Significant correlations are indicated in red text.

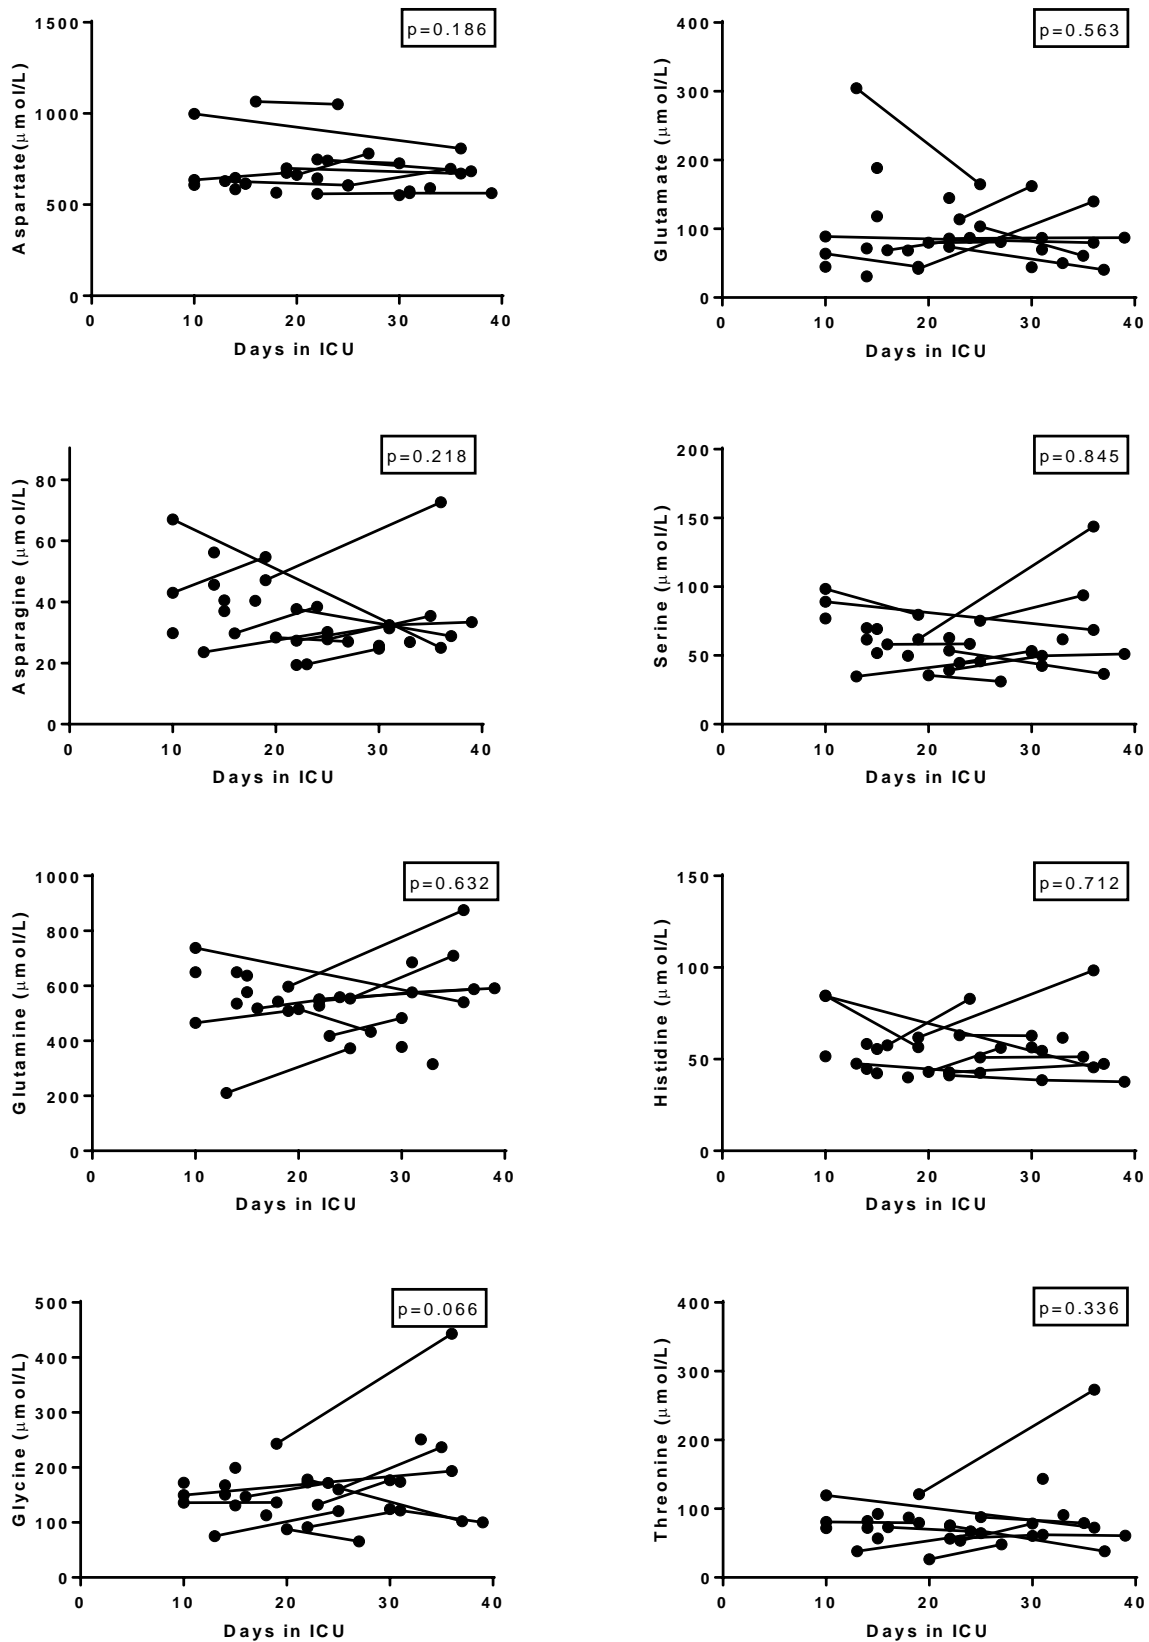

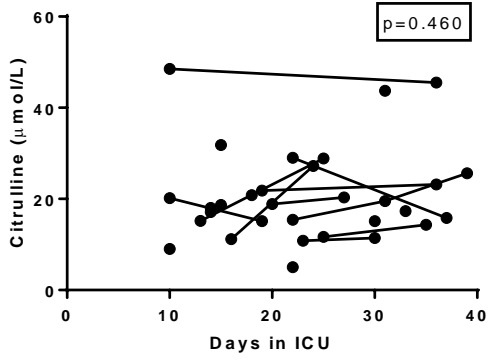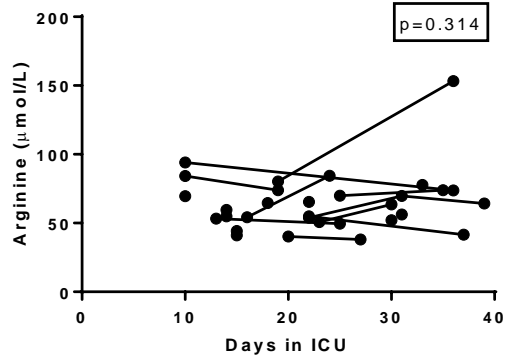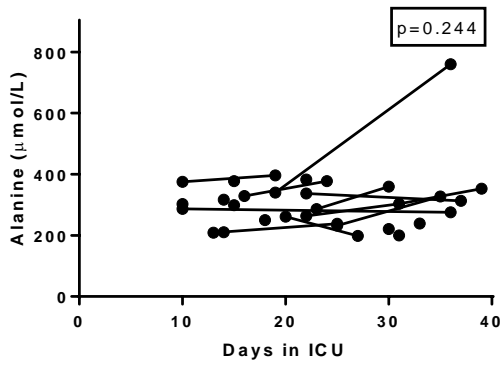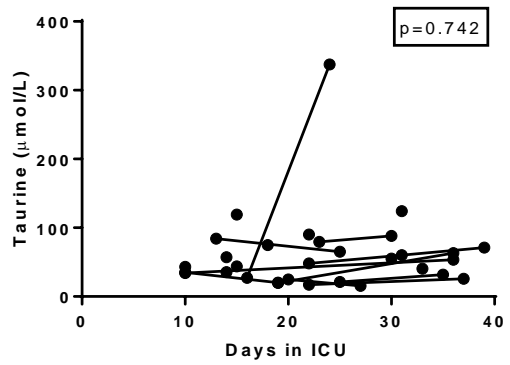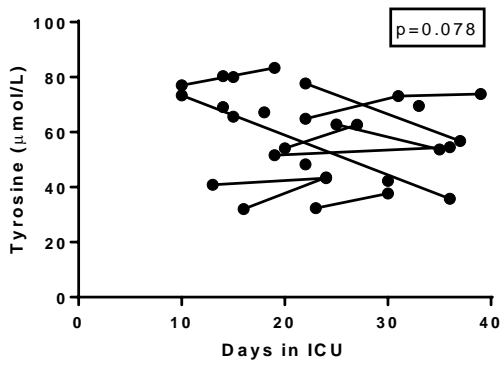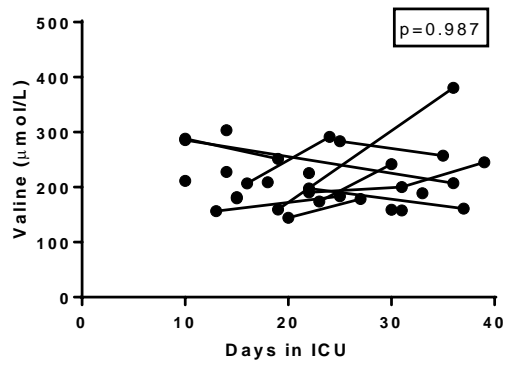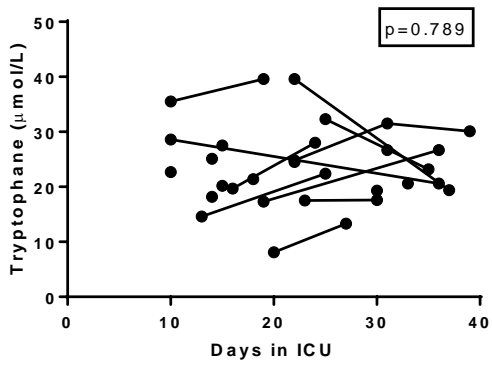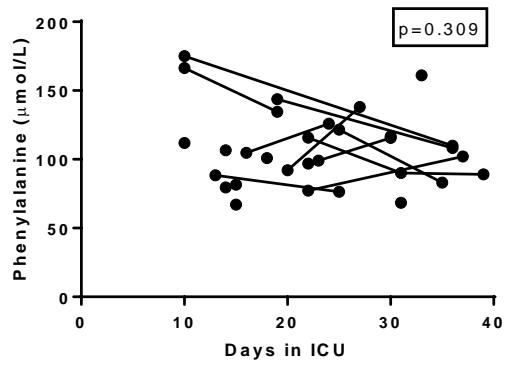

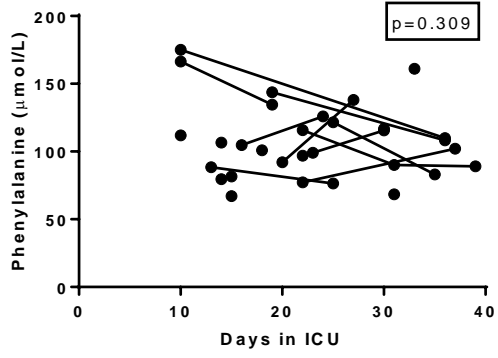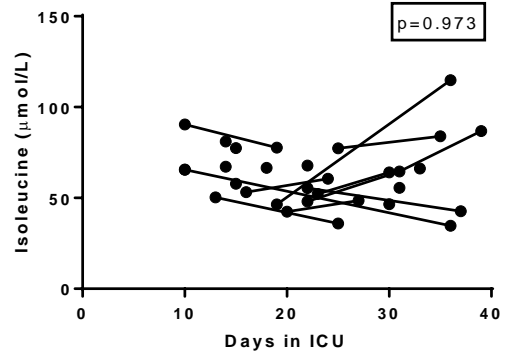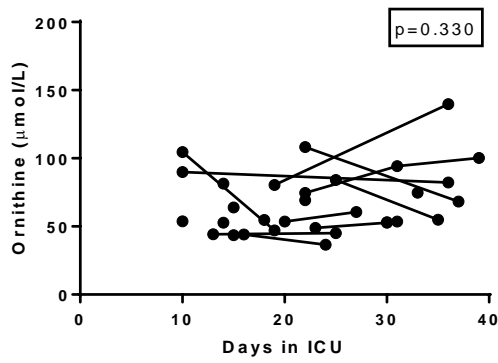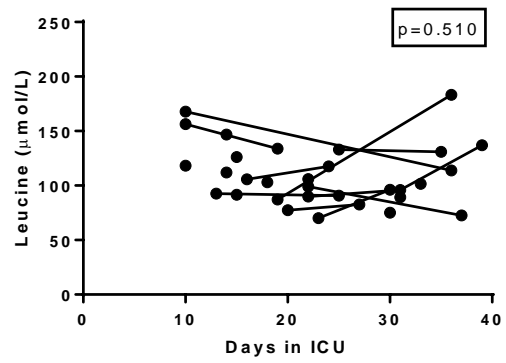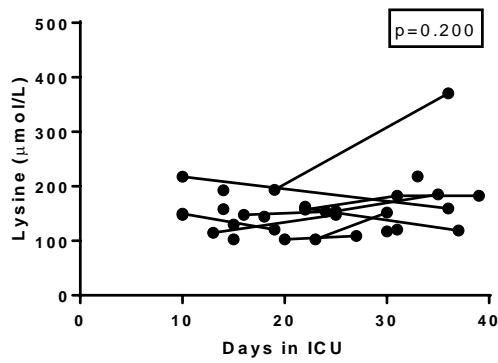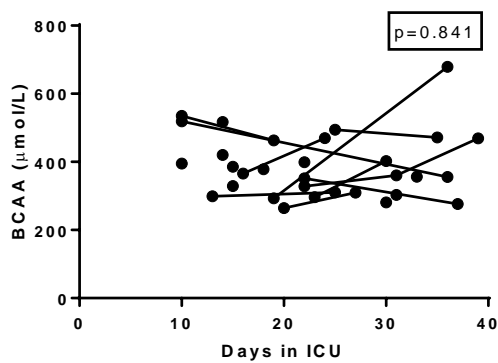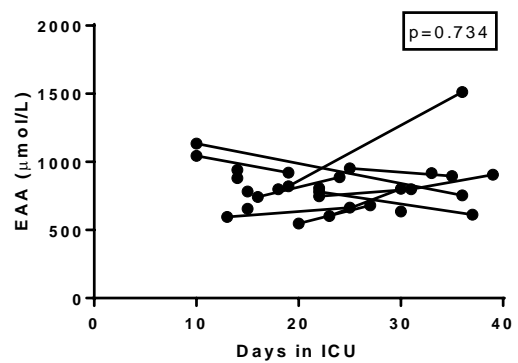

Supplement: MOESM1 [file 15408930]
